# Supplementary material for: Neuronal versus Glial CB2 Receptors: Insights from a Novel CB2-KO-eGFP Reporter Mouse Line
Source: Research Square preprint supplement (doi:10.21203/rs.3.rs-8297538/v1), 2025-12-19

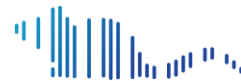

## (Generation of CB2-KO-eGFP mice)

### ZCNR-C: PCR Screening of Mice

#### **Sections:**

#### **I. Identification of Germline Neo Deleted Mice**

1. Schematic and Information
2. Screening for Knockin
3. Screening for FLP Transgene
4. Confirmation of Neo Deletion
5. Confirmation of Short Homology Arm Integration
6. Germline Neo Deleted Mouse Information
7. Reference

## I. Identification of Germline Neo Deleted Mice.

### 1. Schematic and Information

Targeted iTL HF4 (129/SvEv x C57BL/6 FLP) hybrid embryonic stem cells were microinjected into CD-1 blastocysts. Resulting chimeras with a high percentage agouti coat color were mated to C57BL/6N WT mice to generate Germline Neo Deleted mice. Tail DNA was analyzed as described below from pups with agouti or black coat color.

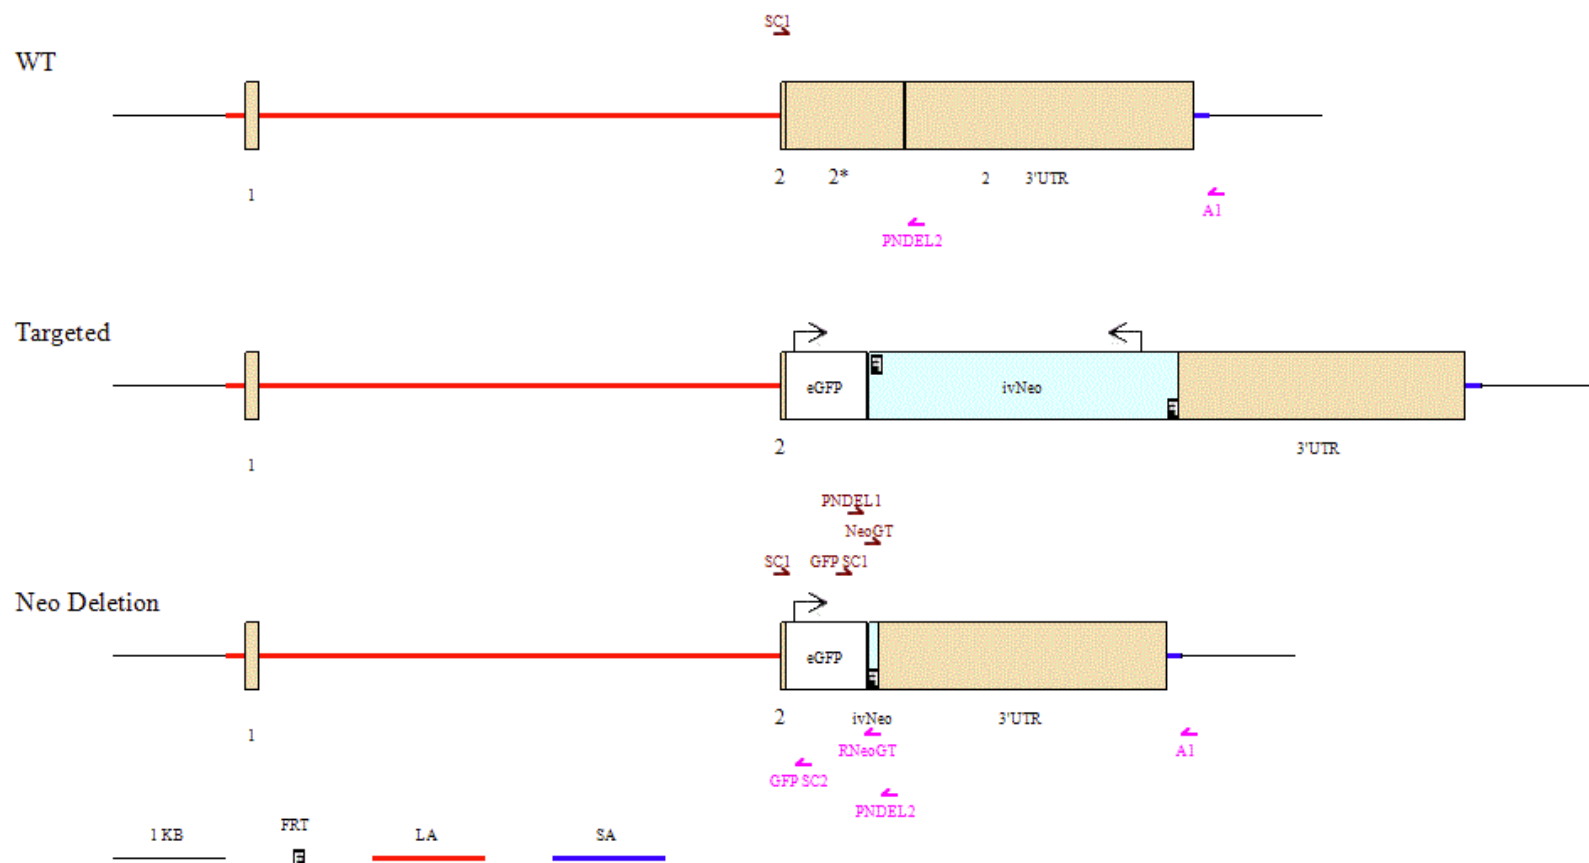

#### Primers for PCR Screening:

##### Forward Oligos

SC1: 5'- GAT TCT TTT CTC CTT GCC CAC AGC -3'  
 GFP SC1: 5'- AGG TGA ACT TCA AGA TCC GCC ACA -3'  
 PNDEL1: 5'- CAA CCA CTA CCT GAG CAC CC -3'  
 NEOGT: 5'- GTC CGT GTC GCG AAG TTC CTA TAC TTT C -3'

##### Reverse Oligos

GFP SC2: 5'- AGA TGA ACT TCA GGG TCA GCT TGC -3'  
 RNEOGT: 5'- GAA AGT ATA GGA ACT TCG CGA CAC GGA C -3'  
 PNDEL2: 5'- CGA GGG AGT GAA CTG AAC GG -3'  
 A1: 5'- CGG GTT CTC TGT GCT ATA CCT CCA G -3'  
 newFLP1: 5'- ACA GAG ACA AAG ACA AGC GTT AGT AGG -3'  
 newFLP2: 5'- ATT TCC CAC AAC ATT AGT CAA CTC CGT TAG G-3'

\*The FLP primers cannot be seen in the schematic above.

## 2. Screening for Knockin Reporter

A PCR was performed to confirm the knockin cassette using the SC1 and RNEOGT primers. SC1 is on the long homology arm upstream of the knockin cassette. RNEOGT is inside the remaining Neo cassette downstream of the knockin cassette. This reaction amplifies a 837 bp product when the knockin cassette is present.

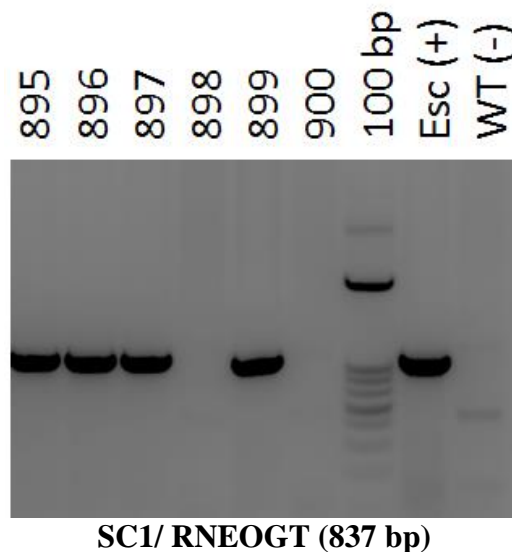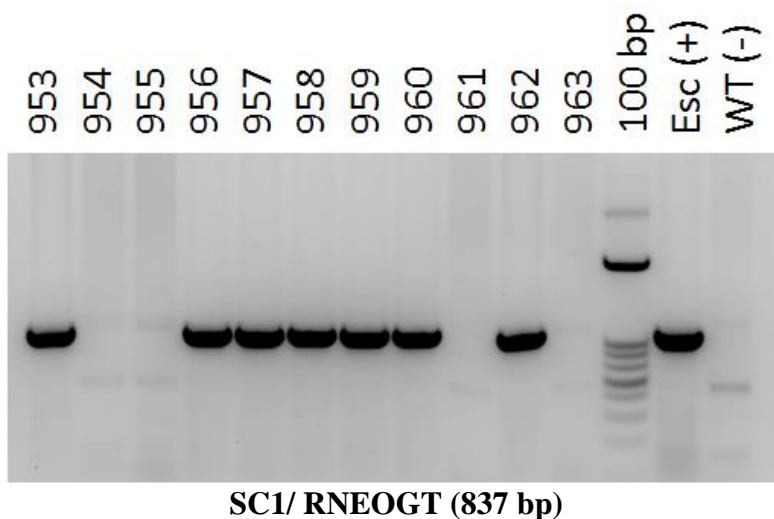

### PCR Parameters for SC1/ RNEOGT:

EconoTaq Plus Green 2x Master Mix (Lucigen catalog# 30033-1)

11.00  $\mu$ L ddH<sub>2</sub>O  
 12.50  $\mu$ L EconoTaq Plus Green 2x Master Mix  
 0.25  $\mu$ L 100  $\mu$ M Primer  
 1.00  $\mu$ L DNA

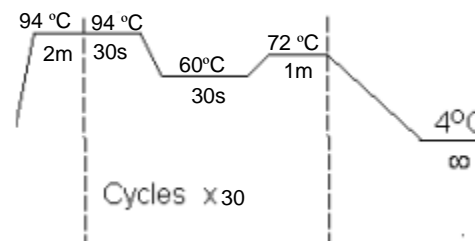

After a 2 minute hot start at 94°C the samples were run using the above conditions. The PCR product was run on a 2% gel with a 100 bp ladder as reference. The expanded ES clone, which was used as a positive control, is denoted by a (+) in the gel photograph above.

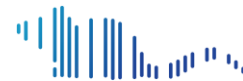

Below is sequencing of representative mouse #897 using primer GFP SC2.

eGFP sequence is in **violet text**, and genomic sequence is in plain text with 3' UTR **shaded**.

```

Query 18      CCTCGCCGGACACGCTGAAGTTGTGGCCGTTTACGTCGCCGTCAGCTCGACCAGGATGG 77
              |||
Sbjct 16319   CCTCGCCGGACACGCTGAAGTTGTGGCCGTTTACGTCGCCGTCAGCTCGACCAGGATGG 16260

Query 78      GCACCAACCCCGGTGAACAGCTCCTCGCCCTTGCTCACCATTGGATGGGCTTTGGCTTCTTC 137
              |||
Sbjct 16259   GCACCAACCCCGGTGAACAGCTCCTCGCCCTTGCTCACCATTGGATGGGCTTTGGCTTCTTC 16200

Query 138     TACTGGAGCTGTCCAGAAAGACTGGGCTGTGGGCAAGGAGAAAAGAATC 186
              |||
Sbjct 16199   TACTGGAGCTGTCCAGAAAGACTGGGCTGTGGGCAAGGAGAAAAGAATC 16151

Query: Sequencing data from PCR products
Sbjct: Respective targeted allele sequence

```

Below is sequencing of representative mouse #899 using primer GFP SC1.

eGFP sequence is in **violet text** and the remaining Neo cassette is in **red text** with the FRT site **underlined**.

```

Query 11      AGCGTGCAGCTCGCCGACCACTACCAGCAGAACACCCCATCGGCGACGGCCCCGTGCTG 70
              |||
Sbjct 16745   AGCGTGCAGCTCGCCGACCACTACCAGCAGAACACCCCATCGGCGACGGCCCCGTGCTG 16804

Query 71      CTGCCCCACAACCACTACCTGAGCACCAGTCCGCCCTGAGCAAAGACCCCAACGAGAAG 130
              |||
Sbjct 16805   CTGCCCCACAACCACTACCTGAGCACCAGTCCGCCCTGAGCAAAGACCCCAACGAGAAG 16864

Query 131     CGCGATCACATGGTCCTGCTGGAGTTCGTGACCGCCGCCGGGATCACTCTCGGCATGGAC 190
              |||
Sbjct 16865   CGCGATCACATGGTCCTGCTGGAGTTCGTGACCGCCGCCGGGATCACTCTCGGCATGGAC 16924

Query 191     GAGCTGTACAAGTAACGTACGTTTCGTGGGATTGTGTCCGTGTCGCGAAGTTCCTATACTT 250
              |||
Sbjct 16925   GAGCTGTACAAGTAACGTACGTTTCGTGGGATTGTGTCCGTGTCGCGAAGTTCCTATACTT 16984

Query: Sequencing data from PCR products
Sbjct: Respective targeted allele sequence

```

### 3. Screening for FLP Transgene

Primer set newFLP1 and newFLP2 was used to screen mice for the FLP transgene. The amplified product for primer set newFLP1 and newFLP2 is 330bp.

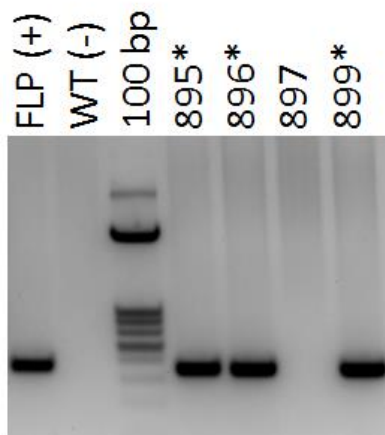

**newFLP1 / newFLP2 (330 bp if FLP transgene present)**  
(\*Asterisked mice are FLP present)

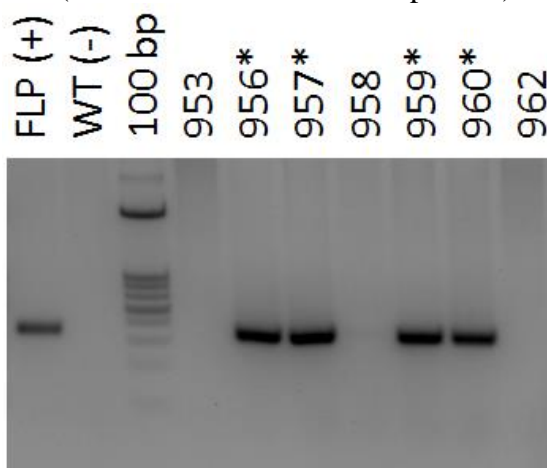

**newFLP1 / newFLP2 (330 bp if FLP transgene present)**  
(\*Asterisked mice are FLP present)

#### PCR Parameters for newFLP1 / newFLP2:

EconoTaq Plus Green 2x Master Mix (Lucigen catalog# 30033-1)

11  $\mu$ L ddH<sub>2</sub>O  
12.5  $\mu$ L EconoTaq Plus Green 2x Master Mix  
.25  $\mu$ L 100  $\mu$ M Primer  
1.0  $\mu$ L DNA

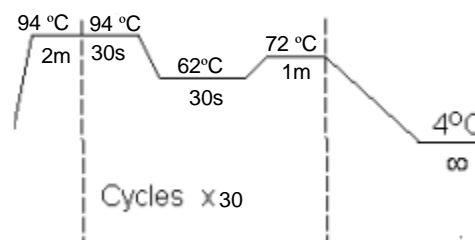

After a 2 minute hot start at 94°C the samples were run using the above conditions. The PCR product was run on a 2% gel with a 100 bp ladder as reference. Tail DNA sample from a FLP mouse was used as a positive control and is denoted by a (+) in the gel photographs.

#### 4. Confirmation of Neo Deletion

Primer set GFP SC1 and PNDEL2 was used to confirm deletion of the Neo cassette. GFP SC1 is inside the GFP cassette upstream of the remaining Neo cassette. PNDEL2 is inside the 3' UTR downstream of the Neo cassette. After Neo deletion, one FRT site remains and a PCR product with a size of 418 bp indicates Neo deletion.

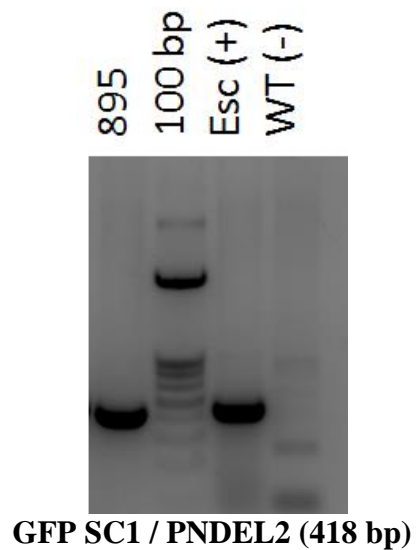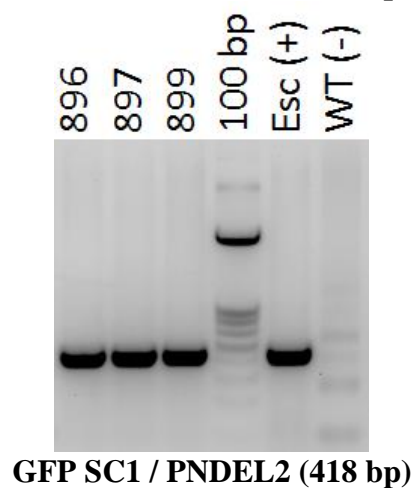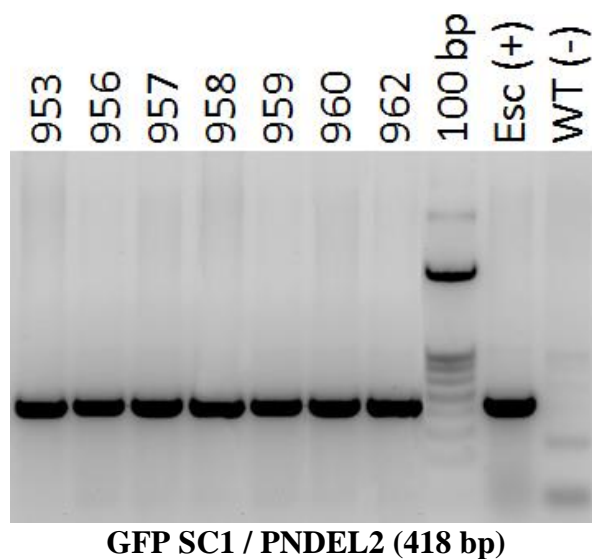

**PCR Parameters for GFP SC1 / PNDEL2:**

EconoTaq Plus Green 2x Master Mix (Lucigen catalog# 30033-1)

11.00  $\mu$ L ddH<sub>2</sub>O  
 12.50  $\mu$ L EconoTaq Plus Green 2x Master Mix  
 0.25  $\mu$ L 100  $\mu$ M Primer  
 1.00  $\mu$ L DNA

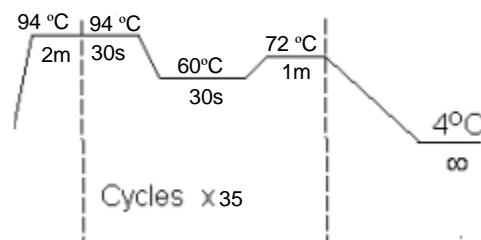

After a 2 minute hot start at 94°C the samples were run using the above conditions. The PCR product was run on a 2% gel with a 100 bp ladder as reference. The band representing Neo deletion was excised and sequenced in positive samples. The expanded ES clone, which was used as a positive control, is denoted by a (+) in the gel photograph above.

Below is sequencing of representative mouse #897 using primer PNDEL1. The sequence shows the deletion of the Neo cassette with the exception of one FRT site.

GFP sequence is in **violet text**, the remaining Neo cassette is **shaded** with the FRT site in **red text**, and the 3' UTR is in plain text.

```

Query   22      AGAAGCGCGATCACATGGTCTGCTGGAGTTCGTGACCGCCGCCGGGATCACTCTCGGCA   81
          ||||||||||||||||||||||||||||||||||||||||||||||||||||||||
Sbjct   16860   AGAAGCGCGATCACATGGTCTGCTGGAGTTCGTGACCGCCGCCGGGATCACTCTCGGCA   16919

Query   82      TGGACGAGCTGTACAAGTAA CGTACGTTCTGTTGGATTGTGTCCGTGTCGCGAAGTTCCTA   141
          ||||||||||||||||||||||||||||||||||||||||||||||||||||||||
Sbjct   16920   TGGACGAGCTGTACAAGTAACGTACGTTCTGTTGGATTGTGTCCGTGTCGCGAAGTTCCTA   16979

Query   142     TACTTTCTAGAGAATAGGAAC TTTGTTGGTACCGTACGCTAGCTGAGCCAGGATCCAGAA   201
          ||||||||||||||||||||||||||||||||||||||||||||||||||||||||
Sbjct   16980   TACTTTCTAGAGAATAGGAAC TTTGTTGGTACCGTACGCTAGCTGAGCCAGGATCCAGAA   17039

Query   202     CTCCAGGCTGCTCCAAGTCTGACACCACCTGTCTTTCTACTGGAAACAGCCCGAGTCAG   261
          ||||||||||||||||||||||||||||||||||||||||||||||||||||||||
Sbjct   17040   CTCCAGGCTGCTCCAAGTCTGACACCACCTGTCTTTCTACTGGAAACAGCCCGAGTCAG   17099

Query   262     AAGTCCGTTCAAGTCACTCCCTCGA   286
          ||||||||||||||||
Sbjct   17100   AAGTCCGTTCAAGTCACTCCCTCGA   17124
  
```

Query: Sequencing data from PCR products  
 Sbjct: Respective targeted allele sequence

## 5. Confirmation of Short Homology Arm Integration

Tail DNA samples from positive mice were amplified with primers NEOGT and A1. NEOGT is located inside the remaining Neo sequence and A1 is located upstream of the short homology arm, outside the region used to create the targeting construct. NEOGT / A1 amplifies a fragment of 2.83 kb in length.

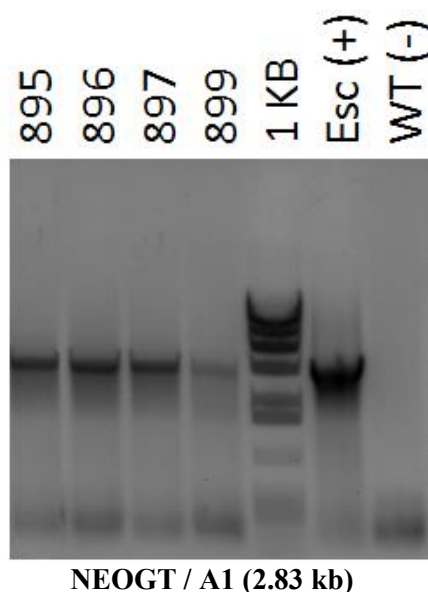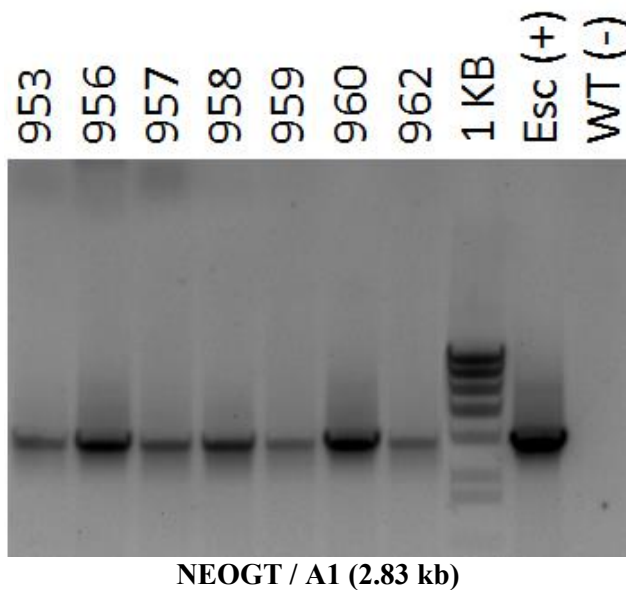

### PCR Parameters for NEOGT / A1:

Expand High Fidelity PCR System (Roche catalog # 04 738 276 001)

17.50  $\mu$ L ddH<sub>2</sub>O  
 2.50  $\mu$ L 200.0  $\mu$ M dNTP  
 2.50  $\mu$ L PCR Buffer with 15mM MgCl<sub>2</sub>  
 1.00  $\mu$ L DMSO  
 0.25  $\mu$ L 100  $\mu$ M Each Primer  
 1.00  $\mu$ L 1.5  $\mu$ L DNA

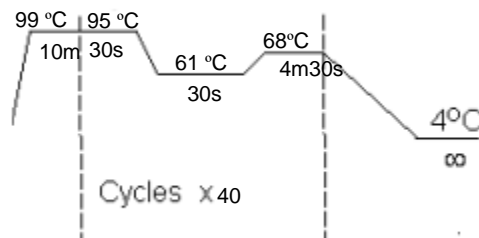

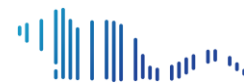

After a 10 minute hot start at 99°C, 0.125 µL of Taq polymerase was added to each PCR sample followed by a layer of 2 drops mineral oil. The PCR product was run on a 0.8% gel with a 1 KB ladder as reference. The expanded ES clone, which was used as a positive control, is denoted by a (+) in the gel photograph above.

## 6. Germline Neo Deleted Mouse Information

The following heterozygous mice were confirmed for Germline Neo Deletion.

| Mouse # | Sex | DOB        | Clone # | Parent Info      |
|---------|-----|------------|---------|------------------|
| 895**   | M   | 10/28/2020 | 131     | CH X C57BL/6N WT |
| 896*    | M   | 10/28/2020 | 131     | CH X C57BL/6N WT |
| 897     | M   | 10/28/2020 | 131     | CH X C57BL/6N WT |
| 899*    | M   | 10/28/2020 | 131     | CH X C57BL/6N WT |
| 953     | M   | 11/01/2020 | 131     | CH X C57BL/6N WT |
| 956*    | F   | 11/01/2020 | 131     | CH X C57BL/6N WT |
| 957*    | F   | 11/01/2020 | 131     | CH X C57BL/6N WT |
| 958     | F   | 11/01/2020 | 131     | CH X C57BL/6N WT |
| 959*    | M   | 11/01/2020 | 131     | CH X C57BL/6N WT |
| 960*    | F   | 11/01/2020 | 131     | CH X C57BL/6N WT |
| 962     | F   | 11/01/2020 | 131     | CH X C57BL/6N WT |

**\*Asterisked mice are recommended to be mated with Wildtype to remove FLP Transgene**

**\*\*Asterisked mouse #895 will be retained at iTL facility as backup.**

## 7. Reference

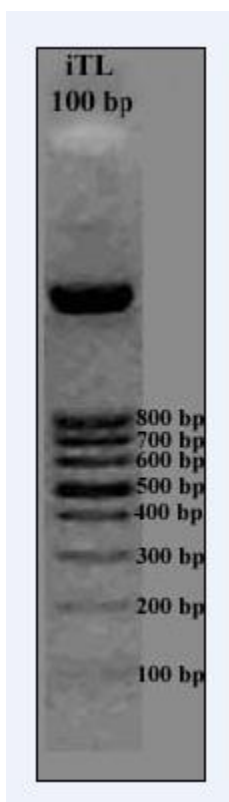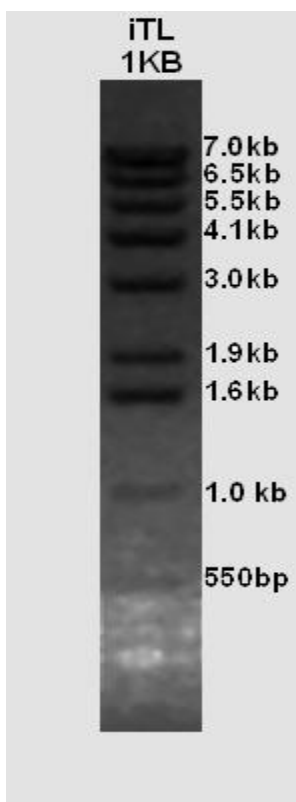

Supplement: Supplementary file 1 [file c71f92d2e7d99acf30a25c1a.pdf]
